# Supplementary material
Source: PubMed Central journal article supplement (PMC4566150)
Supplement: NIHMS671594-supplement-Supplemental_data.pdf [file NIHMS671594-supplement-Supplemental_data.pdf]

Supplementary Table 1a – Characteristics of the 48 studies included in the meta-analysis

| No. | First author, publication year      | Study name (or description); country, recruitment period | Study design, outcome | Last FU (FU <sup>a</sup> , yrs.) | Total no. men/cases <sup>b</sup> | Smoking category*                                                       | No. cases*                           | RR (95% CI)*                                                                                                   | Variables the results were adjusted for; Other comments                                                                                                                                                                                           |
|-----|-------------------------------------|----------------------------------------------------------|-----------------------|----------------------------------|----------------------------------|-------------------------------------------------------------------------|--------------------------------------|----------------------------------------------------------------------------------------------------------------|---------------------------------------------------------------------------------------------------------------------------------------------------------------------------------------------------------------------------------------------------|
| 1   | Hammond, 1958 <sup>38</sup>         | American Cancer Society cohort; USA, 1952                | Cohort, mortality     | 1955 (NR)                        | 187783/185                       | Never-smoker<br>Ever                                                    | 60<br>77                             | Referent<br>1.57 (1.39-2.17)                                                                                   | Age                                                                                                                                                                                                                                               |
| 2   | Hammond, 1966 <sup>39</sup>         | Cancer Prevention Study I; USA, 1959-1960                | Cohort, mortality     | 1963 (NR)                        | 440558/343                       | Never-smoker<br>Ever                                                    | 152<br>191                           | Referent<br>1.13 (0.74-1.52)                                                                                   | Age;<br>Adjusted RRs but no 95% CIs (we calculated 95% CIs)                                                                                                                                                                                       |
| 3   | Severson, 1989 <sup>42</sup>        | Men of Japanese ancestry in Hawaii; USA, 1965-1968       | Cohort, incidence     | 1986 (NR)                        | 8006/174                         | Never-smoker<br>Ever<br>Current                                         | 63<br>111<br>65                      | Referent<br>0.88 (0.65-1.11)<br>0.87 (0.61-1.23)                                                               | Age                                                                                                                                                                                                                                               |
| 4   | Thompson, 1989 <sup>44</sup>        | Rancho Bernardo, California; USA, 1972-1974              | Cohort, incidence     | 1987 (NR)                        | 1776/ 54                         | Not-smoker<br>Smoker                                                    | 43<br>11                             | Referent<br>1.3 (0.70-2.5)                                                                                     | Age, whole milk and egg intake, BMI, diabetes, heart disease, cholesterol;<br>Prevalent cases were also reported. Only incident cases were considered for this analysis. 90% CIs were reported for the associations; we converted them to 95% CIs |
| 5   | Mills, 1989, 1992 <sup>43,106</sup> | Adventist Health Study; USA, 1976                        | Cohort, incidence     | 1982 (NR)                        | 35000/172                        | Never-smoker<br>Ever<br>Current                                         | 90<br>82<br>3                        | Referent<br>1.07 (0.74-1.41)<br>0.49 (0.16-1.57)                                                               | Age                                                                                                                                                                                                                                               |
| 6   | Akiba, 1990 <sup>45</sup>           | Six-Prefecture Cohort Study; Japan, 1965                 | Cohort, mortality     | 1981 (16)                        | 122261/147                       | Never-smoker<br>Current<br>1-4 Cig/day<br>5-14<br>15-24<br>25-34<br>35+ | 39<br>108<br>8<br>50<br>42<br>3<br>5 | Referent<br>1.1 (0.7-1.5)<br>3.1 (1.4-6.4)<br>1.0 (0.7-1.6)<br>0.9 (0.6-1.4)<br>0.8 (0.2-2.1)<br>3.0 (1.0-7.1) | Age, observation period, prefecture of residence, occupation                                                                                                                                                                                      |
| 7   | Hsing, 1990 <sup>46</sup>           | Lutheran Brotherhood Cohort; USA, 1966                   | Cohort, mortality     | 1986 (20)                        | 17633/137                        | Never-smoker<br>Ever<br>Current<br>1-19 Cig/day<br>20-29<br>30+         | 52<br>91<br>26<br>12<br>11<br>3      | Referent<br>1.8 (1.1-2.9)<br>1.6 (1.0-2.6)<br>1.6 (0.8-3.3)<br>1.7 (0.8-3.5)<br>1.4 (0.4-4.4)                  | Age                                                                                                                                                                                                                                               |
| 8   | Hsing, 1991 <sup>47</sup>           | US veterans; USA, 1954-1957                              | Cohort, mortality     | 1980 (NR)                        | 248046/4607                      | Never-smoker<br>Ever<br>Current<br>1-9 Cig/day                          | 1075<br>1864<br>1047<br>260          | Referent<br>1.16 (1.10-1.22)<br>1.18 (1.09-1.28)<br>1.11 (0.97-1.28)                                           | Age                                                                                                                                                                                                                                               |

| No. | First author, publication year  | Study name (or description); country, recruitment period | Study design, outcome | Last FU (FU <sup>a</sup> , yrs.) | Total no. men/cases <sup>b</sup> | Smoking category*                                                                                                                                | No. cases*                                                                              | RR (95% CI)*                                                                                                                                                                                                                                     | Variables the results were adjusted for; Other comments                                                                                                                                                                                                                             |
|-----|---------------------------------|----------------------------------------------------------|-----------------------|----------------------------------|----------------------------------|--------------------------------------------------------------------------------------------------------------------------------------------------|-----------------------------------------------------------------------------------------|--------------------------------------------------------------------------------------------------------------------------------------------------------------------------------------------------------------------------------------------------|-------------------------------------------------------------------------------------------------------------------------------------------------------------------------------------------------------------------------------------------------------------------------------------|
|     |                                 |                                                          |                       |                                  |                                  | 10-20<br>21-39<br>40+                                                                                                                            | 695<br>374<br>78                                                                        | 1.15 (1.05-1.27)<br>1.23 (1.09-1.38)<br>1.51 (1.20-1.90)                                                                                                                                                                                         |                                                                                                                                                                                                                                                                                     |
| 9   | Tverdal, 1993 <sup>48</sup>     | Norway, five areas; Norway, 1972-1978                    | Cohort, mortality     | 1988 (13.3)                      | 44290/32                         | Never-smoker<br>Ever<br>Current<br>1-9 Cig/day<br>10-19<br>20+                                                                                   | 4<br>23<br>15<br>7<br>5<br>3                                                            | Referent<br>1.85 (0.71-7.78)<br>1.92 (0.61-7.96)<br>3.95 (1.01-18.42)<br>1.18 (0.25-5.93)<br>1.69 (0.25-10.00)                                                                                                                                   | Age                                                                                                                                                                                                                                                                                 |
| 10  | Hiatt, 1994 <sup>49</sup>       | Kaiser Permanente Medical Care Program; USA, 1978-1985   | Cohort, incidence     | 1985 (NR)                        | 43432/238                        | Never-smoker<br>Ever<br>Current<br>1-19 Cig/day<br>20+                                                                                           | 79<br>143<br>49<br>24<br>25                                                             | Referent<br>1.1 (0.9-1.4)<br>1.2 (0.8-1.6)<br>1.0 (0.6-1.6)<br>1.9 (1.2-3.1)                                                                                                                                                                     | Age, race, education, alcohol intake; Retrospective cohort using insurance records                                                                                                                                                                                                  |
| 11  | Le Marchand, 1994 <sup>50</sup> | Hawaii State Department of Health cohort; USA, 1975-1980 | Cohort, incidence     | 1989 (NR)                        | 20316/198                        | Non-smoker<br>Ever<br>1-10 Cig/day<br>11-20<br>21+<br>Cumulative use<br>1-22 pk-yr<br>23-44<br>45+                                               | NR<br>NR<br>NR<br>NR<br>NR<br>NR<br>NR<br>NR                                            | Referent<br>1.0 (0.7-1.2)<br>0.9 (0.6-1.4)<br>1.0 (0.7-1.6)<br>1.0 (0.6-1.6)<br>0.9 (0.5-1.5)<br>0.7 (0.4-1.2)<br>1.2 (0.8-1.8)                                                                                                                  | Age, ethnicity, income; Results were reported by quartiles. The interquartile range for cigarettes/day and pack-yrs. were reported as 0-20 and 0-44, respectively. We considered following categories: 0, 1-10, 11-20, and ≥20 cigarettes/day and 0, 1-22, 23-44, and ≥45 pack-yrs. |
| 12  | Adami, 1996 <sup>53</sup>       | Swedish Construction workers; Sweden, 1971-1975          | Cohort, incidence     | 1991 (18)                        | 135006/2368                      | Never-smoker<br>Ever<br>Duration<br>1-10 years<br>11-20<br>21-30<br>31-40<br>41+<br>Current<br>Non-smoker<br>1-4 Cig/day<br>5-14<br>15-24<br>25+ | 682<br>1686<br>19<br>92<br>255<br>454<br>228<br>1069<br>1348<br>282<br>459<br>239<br>38 | Referent<br>1.10 (1.02-1.18)<br>0.58 (0.43-1.07)<br>1.27 (1.02-1.58)<br>1.09 (0.94-1.26)<br>1.13 (1.01-1.28)<br>1.07 (0.92-1.25)<br>1.11 (1.01-1.23)<br>Referent<br>1.06 (0.93-1.20)<br>1.10 (0.99-1.22)<br>1.14 (0.99-1.31)<br>1.00 (0.72-1.38) | Age;                                                                                                                                                                                                                                                                                |

| No. | First author, publication year | Study name (or description); country, recruitment period | Study design, outcome | Last FU (FU <sup>a</sup> , yrs.) | Total no. men/cases <sup>b</sup> | Smoking category*                                                                                                | No. cases*                                                    | RR (95% CI)*                                                                                                                                                                                 | Variables the results were adjusted for; Other comments                                                                           |
|-----|--------------------------------|----------------------------------------------------------|-----------------------|----------------------------------|----------------------------------|------------------------------------------------------------------------------------------------------------------|---------------------------------------------------------------|----------------------------------------------------------------------------------------------------------------------------------------------------------------------------------------------|-----------------------------------------------------------------------------------------------------------------------------------|
|     |                                |                                                          | Cohort, mortality     | 1991 (18)                        | 135006/709                       | Never-smoker<br>Ever<br>Current<br>1-4 Cig/day<br>5-14<br>15+<br>Duration<br>1-20 years<br>21-30<br>31-40<br>41+ | 198<br>511<br>343<br>80<br>141<br>76<br>42<br>75<br>134<br>85 | Referent<br>1.16 (0.99-1.32)<br>1.26 (1.06-1.50)<br>0.99 (0.78-1.26)<br>1.13 (0.93-1.37)<br>1.05 (0.82-1.35)<br>1.41 (0.99-1.99)<br>1.28 (0.98-1.67)<br>1.19 (0.96-1.48)<br>1.28 (0.99-1.65) | Same as above                                                                                                                     |
| 13  | Coughlin, 1996 <sup>54</sup>   | Multiple Risk Factor Intervention Trial; USA, 1973-1975  | Cohort, mortality     | 1990 (16)                        | 348874/826                       | Non-smoker<br>Current<br>1-15 Cig/day<br>16-25<br>26-35<br>36-45<br>46+                                          | 514<br>312<br>79<br>102<br>58<br>57<br>16                     | Referent<br>1.31 (1.13-1.52)<br>1.54 (1.08-2.20)<br>1.27 (0.92-1.75)<br>1.23 (0.89-1.69)<br>1.50 (0.99-2.26)<br>1.22 (0.58-2.58)                                                             | Age;<br>Adjusted RRs but no 95% CIs (we calculated 95% CIs)                                                                       |
| 14  | Engeland, 1996 <sup>55</sup>   | Migrant Study, Norway; Norway, 1964-1965                 | Cohort, incidence     | 1993 (NR)                        | 11863/707                        | Never-smoker<br>Ever<br>Current                                                                                  | 139<br>568<br>451                                             | Referent<br>1.0 (0.9-1.3)<br>1.1 (0.9-1.3)                                                                                                                                                   | Age                                                                                                                               |
| 15  | Cerhan, 1997 <sup>56</sup>     | Iowa 65+ Rural Health Study; USA, 1981-1982              | Cohort, incidence     | 1993 (NR)                        | 1050/ 71                         | Never-smoker<br>Ever<br>Current<br>1-19 Cig/day<br>20+<br>Cumulative use<br>1-30 pk-yr<br>31-55<br>56+           | 26<br>45<br>15<br>6<br>9<br>14<br>12<br>16                    | Referent<br>1.4 (0.7-2.0)<br>2.2 (1.1-4.4)<br>1.8 (0.7-4.4)<br>2.7 (1.2-6.0)<br>1.3 (0.7-2.5)<br>1.3 (0.7-2.7)<br>2.0 (1.1-3.8)                                                              | Age                                                                                                                               |
| 16  | Rodriguez, 1997 <sup>57</sup>  | Cancer Prevention Study II; USA, 1982                    | Cohort, mortality     | 1991 (9)                         | 450279/1748                      | Never-smoker<br>Ever<br>Current<br>1-9 Cig/day<br>10-19<br>20-20<br>21+                                          | 485<br>897<br>339<br>42<br>74<br>108<br>107                   | Referent<br>1.09 (0.98-1.19)<br>1.34 (1.16-1.56)<br>1.33 (0.96-1.83)<br>1.58 (1.23-2.03)<br>1.38 (1.10-1.71)<br>1.25 (1.00-1.57)                                                             | Age, race, education, alcohol intake, vegetable and fat meat intakes, family history of prostate cancer, vasectomy, exercise, BMI |

| No. | First author, publication year  | Study name (or description); country, recruitment period    | Study design, outcome | Last FU (FU <sup>a</sup> , yrs.) | Total no. men/cases <sup>b</sup> | Smoking category*                                                                                     | No. cases*                                        | RR (95% CI)*                                                                                                                                         | Variables the results were adjusted for; Other comments                                           |
|-----|---------------------------------|-------------------------------------------------------------|-----------------------|----------------------------------|----------------------------------|-------------------------------------------------------------------------------------------------------|---------------------------------------------------|------------------------------------------------------------------------------------------------------------------------------------------------------|---------------------------------------------------------------------------------------------------|
|     |                                 |                                                             |                       |                                  |                                  | Duration<br>1-25 years<br>26-35<br>36-45<br>46+                                                       | 13<br>43<br>118<br>155                            | 1.36 (0.77-2.38)<br>1.65 (1.17-2.34)<br>1.39 (1.11-1.75)<br>1.26 (1.04-1.53)                                                                         |                                                                                                   |
| 17  | Veierod, 1997 <sup>59</sup>     | Norwegian health screening; Norway, 1977-1983               | Cohort, incidence     | 1992 (12.4)                      | 24051/72                         | Never-smoker<br>Ever<br>Current<br>1-10 Cig/day<br>11+                                                | 24<br>45<br>25<br>11<br>14                        | Referent<br>0.6 (0.3-0.8)<br>0.5 (0.2-0.8)<br>0.5 (0.3-1.1)<br>0.6 (0.3-1.2)                                                                         | Age                                                                                               |
| 18  | Giovannucci, 1999 <sup>60</sup> | Health Professionals Follow-up Study; USA, 1986             | Cohort, mortality     | 1994 (NR)                        | 47781/103                        | Never-smoker<br>Ever<br>Current<br>Cumulative use <sup>c</sup><br>1-9 pk-yr<br>10-14<br>15+           | 38<br>65<br>26<br>5<br>10<br>11                   | Referent<br>1.18 (0.76-1.57)<br>1.58 (0.81-3.10)<br>1.25 (0.50-3.10)<br>1.76 (0.91-3.42)<br>2.06 (1.08-3.90)                                         | Age, quintiles of intakes of calcium, total fat, vitamin E and lycopene, BMI at age 21            |
| 19  | Heikkila, 1999 <sup>61</sup>    | Mobile Clinic Health Examination Survey; Finland, 1966-1972 | Nested CCS, incidence | 1991 (NR)                        | 16481/166 (300)                  | Non-smoker<br>Current                                                                                 | 114<br>52                                         | Referent<br>1.31 (0.87-1.95) <sup>d</sup>                                                                                                            | None                                                                                              |
| 20  | Parker, 1999 <sup>62</sup>      | Iowa farming; USA, 1986-1989                                | Cohort, incidence     | 1995 (NR)                        | 1177/81                          | Never-smoker<br>Ever<br>Current<br>1-19 Cig/day<br>20+                                                | 23<br>55<br>41<br>25<br>16                        | Referent<br>1.4 (0.8-2.0)<br>1.8 (0.6-2.9)<br>1.7 (0.8-3.8)<br>1.9 (0.8-4.5)                                                                         | Age;<br>Retrospective cohort                                                                      |
| 21  | Will, 1999 <sup>63</sup>        | Cancer Prevention Study I; USA, 1959-1960                   | Cohort, incidence     | 1972 (NR)                        | 305065/2523                      | Non-smoker<br>Current                                                                                 | 1267<br>1256                                      | Referent<br>1.00 (0.92-1.08)                                                                                                                         | Age                                                                                               |
| 22  | Lotufo, 2000 <sup>64</sup>      | Physicians' Health Study; USA, 1982                         | Cohort, incidence     | NR (12.5)                        | 21985/996                        | Never-smoker<br>Ever<br>Current<br>1-19 Cig/day<br>20+<br>Cumulative use<br><20 pk-yr<br>20-39<br>40+ | 443<br>553<br>96<br>35<br>61<br>236<br>129<br>126 | Referent<br>1.10 (0.97-1.28)<br>1.06 (0.83-1.29)<br>1.04 (0.73-1.48)<br>1.07 (0.82-1.41)<br>1.22 (1.04-1.43)<br>0.98 (0.81-1.19)<br>1.14 (0.93-1.40) | Age, alcohol intake, aspirin assignment, beta-carotene assignment, physical activity, height, BMI |

| No. | First author, publication year  | Study name (or description); country, recruitment period | Study design, outcome | Last FU (FU <sup>a</sup> , yrs.) | Total no. men/cases <sup>b</sup> | Smoking category*                                                                                                               | No. cases*                                                        | RR (95% CI)*                                                                                                                                                                                                     | Variables the results were adjusted for; Other comments                                                                         |
|-----|---------------------------------|----------------------------------------------------------|-----------------------|----------------------------------|----------------------------------|---------------------------------------------------------------------------------------------------------------------------------|-------------------------------------------------------------------|------------------------------------------------------------------------------------------------------------------------------------------------------------------------------------------------------------------|---------------------------------------------------------------------------------------------------------------------------------|
|     |                                 |                                                          | Cohort, mortality     | NR (12.5)                        | 20375/113                        | Never-smoker<br>Ever<br>Current<br>1-19 Cig/day<br>20+<br>Cumulative use<br>0.25-19 pk-yr<br>20-39<br>40+                       | 45<br>68<br>11<br>4<br>7<br>25<br>16<br>12                        | Referent<br>1.28 (0.82-1.74)<br>1.23 (0.63-2.41)<br>1.25 (0.45-3.49)<br>1.22 (0.54-2.74)<br>1.35 (0.82-2.23)<br>1.14 (0.64-2.05)<br>0.91 (0.47-1.75)                                                             | Same as above                                                                                                                   |
| 23  | Lund-Nilsen, 2000 <sup>65</sup> | Nord-Trøndelag; Norway, 1984-1986                        | Cohort, incidence     | 1996 (9.3)                       | 22895/644                        | Never-smoker<br>Ever<br>Current<br>1-8 Cig/day<br>9-10<br>11-15<br>16+<br>Cumulative use<br>1-10 pk-yr<br>11-17<br>18-25<br>26+ | 222<br>336<br>153<br>73<br>67<br>51<br>45<br>50<br>34<br>58<br>73 | Referent<br>0.97 (0.83-1.12)<br>0.96 (0.78-1.19)<br>0.84 (0.64-1.10)<br>1.05 (0.79-1.39)<br>1.37 (1.00-1.88)<br>1.27 (0.91-1.76)<br>0.95 (0.70-1.30)<br>0.84 (0.58-1.21)<br>1.24 (0.92-1.67)<br>1.22 (0.93-1.60) | Age                                                                                                                             |
| 24  | Nomura, 2000 <sup>66</sup>      | Honolulu Heart Program; USA, 1971-1977                   | Nested CCS, incidence | 1995 (NR)                        | 9413/249 (249)                   | Never-smoker<br>Ever<br>Current (cumulative use)<br>1-30 pk-yr<br>31+                                                           | 87<br>238<br>76<br>20<br>56                                       | Referent<br>1.2 (0.9-1.6)<br>1.3 (0.8-2.0)<br>1.4 (0.7-2.9)<br>1.2 (0.8-2.0)                                                                                                                                     | Age                                                                                                                             |
| 25  | Visvanathan, 2004 <sup>67</sup> | Campaign against Cancer and Stroke (CLUE II); USA, 1989  | Nested CCS, incidence | 1996 (NR)                        | 10178/164 (324)                  | Never-smoker<br>Ever<br>Current                                                                                                 | 63<br>101<br>14                                                   | Referent<br>0.99 (0.63-1.36)<br>0.82 (0.39-1.71)                                                                                                                                                                 | Age;<br>Of 10457 men included in the study, 279 men with cancer (other than non-melanoma skin cancer) at baseline were excluded |
| 26  | Eichholzer, 2005 <sup>68</sup>  | Basel cohort study; Switzerland, 1971-1973               | Cohort, mortality     | 1990 (NR)                        | 2974/30                          | Non-smoker<br>Current                                                                                                           | 16<br>14                                                          | Referent<br>1.16 (0.56-2.38) <sup>d</sup>                                                                                                                                                                        | None                                                                                                                            |
| 27  | Hultdin, 2005 <sup>69</sup>     | Northern Sweden Health and Disease Cohort; Sweden,       | Nested CCS, incidence | NR (4.9)                         | 37776/254 (514)                  | Never-smoker<br>Ever<br>Current                                                                                                 | 115<br>124<br>45                                                  | Referent<br>1.08 (0.79-1.48) <sup>d</sup><br>0.93 (0.61-1.41) <sup>d</sup>                                                                                                                                       | None                                                                                                                            |

| No. | First author, publication year  | Study name (or description); country, recruitment period                     | Study design, outcome | Last FU (FU <sup>a</sup> , yrs.) | Total no. men/cases <sup>b</sup> | Smoking category*                                                                                                         | No. cases*                                         | RR (95% CI)*                                                                                                                                                             | Variables the results were adjusted for; Other comments                                                                                                                                                                  |
|-----|---------------------------------|------------------------------------------------------------------------------|-----------------------|----------------------------------|----------------------------------|---------------------------------------------------------------------------------------------------------------------------|----------------------------------------------------|--------------------------------------------------------------------------------------------------------------------------------------------------------------------------|--------------------------------------------------------------------------------------------------------------------------------------------------------------------------------------------------------------------------|
|     |                                 | 1985-1999                                                                    |                       |                                  |                                  |                                                                                                                           |                                                    |                                                                                                                                                                          |                                                                                                                                                                                                                          |
| 28  | Baglietto, 2006 <sup>70</sup>   | Melbourne Collaborative Cohort Study; Australia, 1990-1994                   | Cohort, incidence     | 2003 (10.3)                      | 16872/732                        | Never-smoker<br>Ever<br>Current                                                                                           | 291<br>430<br>76                                   | Referent<br>0.94 (0.81-1.07) <sup>d</sup><br>0.73 (0.56-0.94) <sup>d</sup>                                                                                               | None                                                                                                                                                                                                                     |
| 29  | Giovannucci, 2007 <sup>71</sup> | Health Professionals Follow-up Study; USA, 1986                              | Cohort, incidence     | 2002 (NR)                        | 47750/3544                       | Never<br>Current/former (quit ≤10yr)                                                                                      | NR<br>NR                                           | Referent<br>0.98 (0.89-1.07)                                                                                                                                             | Age, time period, race, family history of prostate cancer, diabetes, intakes of total calories, processed meat, fish, α-linolenic acid, tomato sauce and vitamin E supplements, physical activity, height, BMI at age 21 |
|     |                                 |                                                                              | Cohort, mortality     | 2002 (NR)                        | 47750/312                        | Never-smoker<br>Current/former (quit ≤10yr)                                                                               | NR<br>NR                                           | Referent<br>1.41 (1.04-1.91)                                                                                                                                             | Same as above                                                                                                                                                                                                            |
| 30  | Gonzalez, 2007 <sup>11</sup>    | Vitamins and Lifestyle (VITAL); USA, 2000-2002                               | Cohort, incidence     | 2004 (3.3)                       | 35244/832                        | Never-smoker<br>Ever<br>Current                                                                                           | 303<br>516<br>62                                   | Referent<br>0.92 (0.70-1.20)<br>0.94 (0.82-1.05)                                                                                                                         | Age                                                                                                                                                                                                                      |
| 31  | Huxley, 2007 <sup>12</sup>      | Asia Pacific Cohort Studies Collaboration; Australia, New Zealand, 1966-1999 | Cohort, mortality     | NR (6.8)                         | 54353/265                        | Never-smoker<br>Current<br>Increment of 5 Cig/day                                                                         | NR<br>53<br>265                                    | Referent<br>1.67 (1.12-2.45)<br>1.12 (1.03-1.22)                                                                                                                         | Age, diabetes, BMI;<br>The median FU was the median of FU for individual studies, which varied from 2.5 to 24.7 years.                                                                                                   |
|     |                                 | Asia, 1961-1998                                                              | Cohort, mortality     | NR (6.8)                         | 266499/43                        | Never-smoker<br>Current<br>Increment of 5 Cig/day                                                                         | NR<br>26<br>43                                     | Referent<br>0.57 (0.24-1.32)<br>0.77 (0.56-1.05)                                                                                                                         | Same as above<br>The Asian territories included China, Hong Kong, Japan, Singapore, South Korea, Taiwan                                                                                                                  |
| 32  | Ozasa, 2007 <sup>13</sup>       | Japan Collaborative Cohort Study (JACC), 1988-1990                           | Cohort, mortality     | 2003 (12.5)                      | 46178/150                        | Never-smoker<br>Ever<br>Current<br><15 Cig/day<br>15-24<br>25+<br>Duration<br><25 years<br>25-39<br>40+<br>Cumulative use | 26<br>124<br>76<br>17<br>47<br>12<br>1<br>12<br>58 | Referent<br>1.18 (0.79-1.57)<br>1.35 (0.88-2.09)<br>1.06 (0.58-1.94)<br>1.59 (0.99-2.55)<br>1.56 (0.78-3.13)<br>0.83 (0.10-6.42)<br>1.10 (0.52-2.30)<br>1.45 (0.92-2.27) | Age, area of study                                                                                                                                                                                                       |

| No. | First author, publication year | Study name (or description); country, recruitment period | Study design, outcome | Last FU (FU <sup>a</sup> , yrs.) | Total no. men/cases <sup>b</sup>                               | Smoking category*                                              | No. cases*                                                                                                   | RR (95% CI)*                                                                                                                                                                  | Variables the results were adjusted for; Other comments |
|-----|--------------------------------|----------------------------------------------------------|-----------------------|----------------------------------|----------------------------------------------------------------|----------------------------------------------------------------|--------------------------------------------------------------------------------------------------------------|-------------------------------------------------------------------------------------------------------------------------------------------------------------------------------|---------------------------------------------------------|
|     |                                |                                                          |                       |                                  |                                                                | <20 pk-yr<br>20-39<br>40-59<br>60+                             | 4<br>33<br>27<br>7                                                                                           | 0.71 (0.25-2.04)<br>1.58 (0.95-2.62)<br>1.41 (0.83-2.40)<br>1.32 (0.57-3.05)                                                                                                  |                                                         |
| 33  | Park, 2007 <sup>14</sup>       | Multiethnic Cohort Study; USA, 1993-1996                 | Cohort, incidence     | 2002 (8)                         | 82483/<br>4404                                                 | Never-smoker<br>Ever<br>Current<br>1-9 Cig/day<br>10-19<br>20+ | 1326<br>3073<br>673<br>264<br>277<br>132                                                                     | Referent<br>0.99 (0.93-1.06) <sup>d</sup><br>0.84 (0.76-0.92) <sup>d</sup><br>1.07 (0.93-1.23) <sup>d</sup><br>0.89 (0.78-1.02) <sup>d</sup><br>0.54 (0.45-0.65) <sup>d</sup> | None                                                    |
| 34  | Rohrmann, 2007 <sup>72</sup>   | Private census Washington County, Maryland; USA, 1963    | Cohort, incidence     | 1978 (NR)                        | 26810/<br>147                                                  | Never-smoker<br>Ever<br>Current<br>1-9 Cig/day<br>10-19<br>20+ | 34<br>88<br>45<br>5<br>23<br>17                                                                              | Referent<br>1.16 (0.84-1.60)<br>1.00 (0.63-1.59)<br>0.52 (0.20-1.33)<br>1.03 (0.60-1.79)<br>1.38 (0.75-2.54)                                                                  | Age                                                     |
|     |                                |                                                          | Cohort, mortality     | 2000 (NR)                        | 226810/<br>240                                                 | Never-smoker<br>Ever<br>Current<br>1-9 Cig/day<br>10-19<br>20+ | 56<br>161<br>104<br>21<br>49<br>34                                                                           | Referent<br>0.97 (0.76-1.23)<br>0.93 (0.67-1.29)<br>1.11 (0.67-1.84)<br>0.85 (0.57-1.25)<br>0.95 (0.62-1.47)                                                                  | Same as above                                           |
|     |                                | USA, 1975                                                | Cohort, incidence     | 1994 (NR)                        | 28292/<br>351                                                  | Never-smoker<br>Ever<br>Current<br>1-9 Cig/day<br>10-19<br>20+ | 94<br>213<br>85<br>10<br>49<br>26                                                                            | Referent<br>1.01 (0.83-1.24)<br>0.98 (0.73-1.33)<br>1.12 (0.58-2.15)<br>0.95 (0.67-1.35)<br>1.01 (0.65-1.57)                                                                  | Same as above                                           |
|     |                                | Cohort, mortality                                        | 2000 (NR)             | 28292/<br>184                    | Never-smoker<br>Ever<br>Current<br>1-9 Cig/day<br>10-19<br>20+ | 44<br>120<br>59<br>5<br>31<br>23                               | Referent<br>1.13 (0.85-1.49)<br>1.25 (0.84-1.87)<br>1.12 (0.44-2.82)<br>1.11 (0.70-1.77)<br>1.58 (0.94-2.64) | Same as above                                                                                                                                                                 |                                                         |
| 35  | Smit, 2007 <sup>15</sup>       | Puerto Rico Heart Health Program, Puerto Rico, 1965-     | Cohort, mortality     | 2005 (NR)                        | 9777/167                                                       | Never-smoker<br>Ever<br>Current                                | 51<br>116<br>43                                                                                              | Referent<br>1.16 (0.82-1.65) <sup>d</sup><br>1.26 (0.82-1.94) <sup>d</sup>                                                                                                    | None                                                    |

| No. | First author, publication year | Study name (or description); country, recruitment period           | Study design, outcome | Last FU (FU <sup>a</sup> , yrs.) | Total no. men/cases <sup>b</sup> | Smoking category*                                                                                         | No. cases*                                           | RR (95% CI)*                                                                                                                                                             | Variables the results were adjusted for; Other comments                                                                                                                                                                                                                                                         |
|-----|--------------------------------|--------------------------------------------------------------------|-----------------------|----------------------------------|----------------------------------|-----------------------------------------------------------------------------------------------------------|------------------------------------------------------|--------------------------------------------------------------------------------------------------------------------------------------------------------------------------|-----------------------------------------------------------------------------------------------------------------------------------------------------------------------------------------------------------------------------------------------------------------------------------------------------------------|
|     |                                | 1968                                                               |                       |                                  |                                  |                                                                                                           |                                                      |                                                                                                                                                                          |                                                                                                                                                                                                                                                                                                                 |
| 36  | Butler, 2009 <sup>17</sup>     | Singapore Chinese Health Study; Singapore, 1993-1998               | Cohort, incidence     | 2006 (10.4)                      | 27293/250                        | Never-smoker<br>Ever<br>1-12 Cig/day<br>13-22<br>23+<br>Duration<br>1-19 years<br>20-39<br>40+<br>Current | 108<br>142<br>59<br>57<br>26<br>23<br>52<br>67<br>73 | Referent<br>0.95 (0.74-1.16)<br>1.08 (0.79-1.49)<br>0.99 (0.71-1.37)<br>0.71 (0.46-1.10)<br>1.19 (0.76-1.87)<br>0.83 (0.59-1.15)<br>1.02 (0.74-1.41)<br>0.88 (0.65-1.19) | Age, interview year, dialect group, education, intake of vitamin D and black tea; Because of adjustment for dialect group, this article was considered as adjusted for race/ethnicity                                                                                                                           |
| 37  | Watters, 2009 <sup>18</sup>    | NIH-AARP; USA, 1995-1996                                           | Cohort, incidence     | 2003 (NR)                        | 283312/16640                     | Never-smoker<br>Ever<br>Current<br><21 Cig/day<br>21+                                                     | 5512<br>11128<br>1446<br>931<br>515                  | Referent<br>0.89 (0.86-0.91)<br>0.85 (0.80-0.90)<br>0.91 (0.84-0.97)<br>0.75 (0.69-0.83)                                                                                 | Age, race, education, marital status, vigorous physical activity, family history of prostate cancer, diabetes, health disease, total energy, quintiles of intake of $\alpha$ -tocopherol, calcium, red meat, fish, tomato, $\alpha$ -linolenic acid, and selenium, height, BMI, digital rectal examination, PSA |
|     |                                |                                                                    | Cohort, mortality     | 2005 (NR)                        | 283312/394                       | Never-smoker<br>Ever<br>Current<br>1-20 Cig/day<br>21+                                                    | 105<br>289<br>64<br>39<br>25                         | Referent<br>1.13 (0.93-1.34)<br>1.69 (1.25-2.27)<br>1.79 (1.27-2.52)<br>1.54 (1.01-2.34)                                                                                 | Same as above                                                                                                                                                                                                                                                                                                   |
| 38  | Batty, 2011 <sup>19</sup>      | Whitehall I study; UK, 1967-1970                                   | Cohort, mortality     | 2007 (NR)                        | 17934/551                        | Never-smoker<br>Ever<br>Current                                                                           | 123<br>428<br>203                                    | Referent<br>1.03 (0.88-1.21)<br>1.14 (0.91-1.44)                                                                                                                         | Age, marital status, SES, physical activity, height, BMI, BP, FEV1, cholesterol, diabetes/ blood glucose                                                                                                                                                                                                        |
| 39  | Grundmark, 2011 <sup>20</sup>  | Uppsala Longitudinal Study of Adult Men (ULSAM); Sweden, 1970-1974 | Cohort, incidence     | 2003 (26.5)                      | 2045/208                         | Never-smoker<br>Ever<br>Current                                                                           | 69<br>139<br>86                                      | Referent<br>0.67 (0.50-0.83)<br>0.60 (0.44-0.83)                                                                                                                         | None                                                                                                                                                                                                                                                                                                            |
| 40  | Geybels, 2012 <sup>21</sup>    | Netherlands Cohort Study; Netherlands, 1986                        | Cohort, incidence     | 2003 (17.3)                      | 58279/3451                       | Never<br>Ever<br>Current                                                                                  | 492<br>2957<br>1084                                  | Referent<br>1.01 (0.88-1.13)<br>0.98 (0.82-1.18)                                                                                                                         | Age, duration of smoking (smoking years), frequency of smoking (Cig/day)                                                                                                                                                                                                                                        |
| 41  | Karlsen,                       | Danish Diet, Cancer                                                | Cohort,               | 2000-                            | 20914/                           | Non-smoker                                                                                                | 81                                                   | Referent                                                                                                                                                                 | None;                                                                                                                                                                                                                                                                                                           |



| No. | First author, publication year | Study name (or description); country, recruitment period       | Study design, outcome | Last FU (FU <sup>a</sup> , yrs.) | Total no. men/cases <sup>b</sup> | Smoking category*                                                                                                                                                                             | No. cases*                                                                             | RR (95% CI)*                                                                                                                                                                                                                                                                                                         | Variables the results were adjusted for; Other comments                                                                                                                                                                                                           |
|-----|--------------------------------|----------------------------------------------------------------|-----------------------|----------------------------------|----------------------------------|-----------------------------------------------------------------------------------------------------------------------------------------------------------------------------------------------|----------------------------------------------------------------------------------------|----------------------------------------------------------------------------------------------------------------------------------------------------------------------------------------------------------------------------------------------------------------------------------------------------------------------|-------------------------------------------------------------------------------------------------------------------------------------------------------------------------------------------------------------------------------------------------------------------|
|     | 2012 <sup>22</sup>             | and Health Study; Denmark, 1993-1997                           | incidence             | 2002 (NR)                        | 129                              | Current<br>1-10 gr/day<br>11-20<br>21+                                                                                                                                                        | 48<br>13<br>22<br>13                                                                   | 1.00 (0.70-1.43) <sup>d</sup><br>1.28 (0.71-2.30) <sup>d</sup><br>1.06 (0.66-1.69) <sup>d</sup><br>0.81 (0.45-1.45) <sup>d</sup>                                                                                                                                                                                     | Repeated data on tobacco use were also collected in follow-ups. Here only data collected in the baseline are considered                                                                                                                                           |
| 42  | Karppi, 2012 <sup>23</sup>     | Kuopio Ischaemic Heart Disease Risk Factor; Finland, 1984-1989 | Cohort, incidence     | 2008 (15)                        | 997/ 68                          | Non-smoker<br>Smoker                                                                                                                                                                          | 57<br>11                                                                               | Referent<br>0.85 (0.76-0.95) <sup>d</sup>                                                                                                                                                                                                                                                                            | None;<br>Smoking defined as smoking within last 30 days;<br>Another article from the this study reported RR (95% CI) of 0.94 (0.82-1.09) per 10 pack-years, adjusted for age, BMI, physical fitness, and intake of alcohol, fat, fiber, and energy <sup>107</sup> |
| 43  | Shafique, 2012 <sup>24</sup>   | Collaborative study; Scotland, 1970-1972                       | Cohort, incidence     | 2007 (28)                        | 6017/<br>318                     | Never<br>Ever<br>Current                                                                                                                                                                      | 68<br>250<br>136                                                                       | Referent<br>1.08 (0.84-1.32)<br>0.93 (0.69-1.26)                                                                                                                                                                                                                                                                     | Age, social class, alcohol intake, tea intake, BP, BMI, cholesterol                                                                                                                                                                                               |
| 44  | Tseng, 2012 <sup>25</sup>      | Taiwan Insurance; Taiwan, 1995-1998                            | Cohort, mortality     | 2006 (NR)                        | 39135/<br>105                    | Non-smoker<br>Smoker                                                                                                                                                                          | 41<br>64                                                                               | Referent<br>1.09 (0.82-1.46)                                                                                                                                                                                                                                                                                         | Age, area of residence, BMI, diabetes type, diabetes duration, insulin use;<br>Retrospective cohort using a national insurance program's records                                                                                                                  |
| 45  | Bae, 2013 <sup>26</sup>        | Seoul Male Cancer Cohort Study; South Korea, 1991-1992         | Cohort, incidence     | 2008 (NR)                        | 14450/87                         | Never-smoker<br>Ever<br>1-10 Cig/day<br>11-20<br>21-30<br>31+<br>Duration<br>1-10 years<br>11-20<br>21-30<br>31+<br>Cumulative use<br>1-10 pk-yr<br>11-15<br>16-20<br>21-34<br>35+<br>Current | 29<br>57<br>1<br>10<br>20<br>22<br>6<br>16<br>30<br>5<br>8<br>4<br>12<br>21<br>8<br>38 | Referent<br>0.65 (0.40-0.90)<br>1.16 (0.02-1.20)<br>0.82 (0.40-1.66)<br>0.56 (0.32-0.99)<br>0.63 (0.36-1.08)<br>0.65 (0.27-1.57)<br>0.55 (0.30-1.01)<br>0.89 (0.54-1.48)<br>0.53 (0.21-1.37)<br>0.53 (0.24-1.14)<br>0.41 (0.14-1.14)<br>1.08 (0.56-2.09)<br>0.75 (0.43-1.29)<br>0.55 (0.25-1.19)<br>0.70 (0.43-1.13) | Age                                                                                                                                                                                                                                                               |
| 46  | Heikkila,                      | IPD-Work Consortium; Europe,                                   | Cohort, incidence     | 2008 (12)                        | 116056/<br>865                   | Non-Smoker<br>Current                                                                                                                                                                         | 706<br>159                                                                             | Referent<br>0.70 (0.59-0.84) <sup>d</sup>                                                                                                                                                                                                                                                                            | None;<br>A pooled analysis of 12 independent studies in                                                                                                                                                                                                           |

| No. | First author, publication year | Study name (or description); country, recruitment period                               | Study design, outcome | Last FU (FU <sup>a</sup> , yrs.) | Total no. men/cases <sup>b</sup> | Smoking category*                                                                                                   | No. cases*                                                         | RR (95% CI)*                                                                                                                                                                                     | Variables the results were adjusted for; Other comments                                                                                                                                                                                                                                                                                                                                                                             |
|-----|--------------------------------|----------------------------------------------------------------------------------------|-----------------------|----------------------------------|----------------------------------|---------------------------------------------------------------------------------------------------------------------|--------------------------------------------------------------------|--------------------------------------------------------------------------------------------------------------------------------------------------------------------------------------------------|-------------------------------------------------------------------------------------------------------------------------------------------------------------------------------------------------------------------------------------------------------------------------------------------------------------------------------------------------------------------------------------------------------------------------------------|
|     | 2013 <sup>27</sup>             | 1985-2002                                                                              |                       |                                  |                                  |                                                                                                                     |                                                                    |                                                                                                                                                                                                  | Finland, France, the Netherlands, Sweden, Denmark, UK. Partial overlap with Lemonge et al 2013 (GAZEL study), from which 252 prostate cancer cases were included in this pooled analysis. Last follow-ups in participating studies were generally after 1995                                                                                                                                                                        |
| 47  | Koutros, 2013 <sup>28</sup>    | Prostate, Lung, Colorectal and Ovarian Cancer Screening Trial (PLCO); USA, 1993-2001   | Nested CCS, incidence | 2009 (3.4)                       | 28243/680 (824)                  | Never-smoker<br>Ever<br>Current                                                                                     | 247<br>46<br>381                                                   | Referent<br>0.70 (0.58-0.84) <sup>d</sup><br>0.50 (0.36-0.69) <sup>d</sup>                                                                                                                       | None                                                                                                                                                                                                                                                                                                                                                                                                                                |
| 48  | Lemogne, 2013 <sup>29</sup>    | GAZEL study; France, 1989                                                              | Cohort, incidence     | 2009 (15.2)                      | 8877/412                         | Never-smoker<br>Ever<br>Current<br>1-19 pk-yr<br>20+                                                                | NR<br>NR<br>NR<br>NR<br>NR                                         | Referent<br>0.86 (0.73-1.00)<br>0.70 (0.52-0.88)<br>0.76 (0.55-1.05)<br>0.64 (0.44-0.95)                                                                                                         | Age, occupation, alcohol intake, fruit and vegetable intake, BMI; Partial overlap with Heikkila et al 2013 (IPD-Work Consortium)                                                                                                                                                                                                                                                                                                    |
| 49  | Onitilo, 2013 <sup>30</sup>    | Marshfield Clinic; USA, 1995-2009                                                      | Cohort, incidence     | 2011 (NR)                        | 33832/3432                       | <i>Before DM onset</i><br>Never-smoker<br>Ever<br><i>After DM onset</i><br>Never-smoker<br>Ever                     | NR<br>NR<br>NR<br>NR                                               | Referent<br>0.92 (0.85-1.18)<br><br>Referent<br>0.83 (0.74-0.94)                                                                                                                                 | Date of birth, study time period, residence in the study area, insurance status, BMI, and comorbidities. We considered the results as adjusted for age as they were adjusted for both data of birth and study time period; Retrospective cohort using medical records. In the article, ever-use was the reference group. In order to make these results consistent with results of other studies, we changed the reference category |
| 50  | Rohrmann, 2013 <sup>31</sup>   | European Prospective Investigation into Cancer and Nutrition (EPIC); Europe, 1992-2000 | Cohort, incidence     | 2009 (11.9)                      | 145112/4623                      | Never-smoker<br>Ever<br>Current<br>1-14 Cig/day<br>15-24<br>25+<br>Duration<br><10 years<br>10-19<br>20-29<br>30-39 | 1547<br>3076<br>1080<br>420<br>365<br>131<br>10<br>24<br>94<br>401 | Referent<br>0.93 (0.89-0.98)<br>0.90 (0.83-0.97)<br>0.97 (0.87-1.08)<br>0.90 (0.80-1.01)<br>0.87 (0.73-1.05)<br><br>0.78 (0.42-1.46)<br>0.91 (0.60-1.37)<br>0.87 (0.70-1.09)<br>0.90 (0.80-1.01) | Age, study center, education, marital status, height, weight, vigorous physical activity; Conducted in Denmark, France, Germany, UK, Greece, Italy, Spain, Norway, The Netherlands, Sweden                                                                                                                                                                                                                                          |

| No. | First author, publication year | Study name (or description); country, recruitment period                  | Study design, outcome | Last FU (FU <sup>a</sup> , yrs.) | Total no. men/cases <sup>b</sup> | Smoking category*                                                                                                          | No. cases*                                                     | RR (95% CI)*                                                                                                                                                                       | Variables the results were adjusted for; Other comments                                                      |
|-----|--------------------------------|---------------------------------------------------------------------------|-----------------------|----------------------------------|----------------------------------|----------------------------------------------------------------------------------------------------------------------------|----------------------------------------------------------------|------------------------------------------------------------------------------------------------------------------------------------------------------------------------------------|--------------------------------------------------------------------------------------------------------------|
|     |                                |                                                                           |                       |                                  |                                  | 40+                                                                                                                        | 526                                                            | 0.92 (0.82-1.02)                                                                                                                                                                   |                                                                                                              |
|     |                                |                                                                           | Cohort, mortality     | 2009 (11.9)                      | 145112/432                       | Never-smoker<br>Ever<br>Current<br>1-14 Cig/day<br>15-24<br>25+<br>Duration<br><10 years<br>10-19<br>20-29<br>30-39<br>40+ | 128<br>304<br>121<br>40<br>40<br>21<br>0<br>1<br>7<br>33<br>80 | Referent<br>1.06 (0.87-1.24)<br>1.27 (0.98-1.65)<br>1.19 (0.82-1.73)<br>1.31 (0.90-1.91)<br>1.81 (1.11-2.93)<br>–<br>–<br>1.26 (0.55-2.87)<br>1.28 (0.83-1.96)<br>1.38 (1.01-1.87) | Same as above                                                                                                |
| 51  | Sawada, 2013 <sup>32</sup>     | Japan Public Health Center-based Prospective Study (JPHC); Japan, 1990-NR | Cohort, incidence     | 2010 (16)                        | 482018/913                       | Never-smoker<br>Ever<br>Current (cumulative use)<br>1-19 pk-yr<br>20-39<br>40+                                             | 257<br>647<br>380<br>53<br>194<br>133                          | Referent<br>0.80 (0.72-0.89)<br>0.79 (0.68-0.89)<br>0.67 (0.49-0.91)<br>0.84 (0.70-1.02)<br>0.80 (0.65-1.00)                                                                       | Age, public health center area, marital status, diabetes, intake of alcohol, miso soup and Japanese tea, BMI |

**Supplementary Table 1b – Characteristics of the six studies included in the systematic review but not in the meta-analysis due to lack of information**

| No. | First author, publication year | Study name (or description); country, recruitment period       | Study design, outcome | Last FU (FU <sup>a</sup> , yrs.) | Total no. men/cases <sup>b</sup> | Smoking category*                                       | No. cases*                 | RR (95% CI)*                                                                 | Variables the results were adjusted for; Other comments                                                                                                                                                                                                                                          |
|-----|--------------------------------|----------------------------------------------------------------|-----------------------|----------------------------------|----------------------------------|---------------------------------------------------------|----------------------------|------------------------------------------------------------------------------|--------------------------------------------------------------------------------------------------------------------------------------------------------------------------------------------------------------------------------------------------------------------------------------------------|
| 1   | Weir, 1970 <sup>40</sup>       | Labor union members, California; USA, 1954-1957                | Cohort, mortality     | 1962 (7)                         | 68153/37                         | Never-smoker<br>Ever<br>≤0.5 pk-yr<br>~ 1<br>1.5+       | NR<br>NR<br>NR<br>NR       | Referent<br>0.78 (NR, NS)<br>0.58 (NR, NS)<br>0.98 (NR, NS)<br>0.78 (NR, NS) | Age, duration of smoking                                                                                                                                                                                                                                                                         |
| 2   | Whittemore, 1984 <sup>41</sup> | Former College Men and Women; USA, 1962-1966                   | Cohort, incidence     | 1978 (NR)                        | 33915/16                         | NR                                                      | 16                         | NR (NR, NS)                                                                  | NR                                                                                                                                                                                                                                                                                               |
|     |                                |                                                                | Cohort, mortality     | 1978 (NR)                        | 33915/12                         | NR                                                      | NR                         | NR (NR, NS)                                                                  | Same as above                                                                                                                                                                                                                                                                                    |
| 3   | Thune, 1994 <sup>51</sup>      | Norway, three counties; Norway, 1972-1978                      | Cohort, incidence     | 1991 (NR)                        | 42067/211                        | Increment of 10 Cig/day                                 | 211                        | 1.08 (0.90-1.30)                                                             | Age                                                                                                                                                                                                                                                                                              |
| 4   | Gann, 1995 <sup>52</sup>       | Chicago Heart Association cohort; USA, 1967-1973               | Cohort, mortality     | 1979 (19.2)                      | 22367/73                         | Increments of 5 Cig/day                                 | 73                         | 1.02 (0.93-1.12)                                                             | Age, education, BMI, heart rate, BP, cholesterol, postload plasma glucose                                                                                                                                                                                                                        |
| 5   | Tulinus, 1997 <sup>58</sup>    | Icelandic Cardiovascular Risk Factor Study; Iceland, 1967-1991 | Cohort, incidence     | 1995 (NR)                        | 11366/524                        | NR                                                      | 524                        | NR (NR, NS)                                                                  | NR                                                                                                                                                                                                                                                                                               |
| 6   | Doll, 2005 <sup>73</sup>       | British Doctors cohort; UK, 1951                               | Cohort, mortality     | 2001                             | 34439/878                        | Never-smoker<br>Current<br>1-14 Cig/day<br>15-24<br>25+ | NR<br>NR<br>NR<br>NR<br>NR | Referent<br>1.01 (NR)<br>0.75 (NR)<br>1.11 (NR)<br>1.27 (NR)                 | Age;<br>Mortality rates per 100,000 were 89.4 in never-smokers, 66.7 in 1-14 Cig/day, 99.6 in 15-24 Cig/day, and 113.3 among ≥25 Cig/day current smokers                                                                                                                                         |
| 7   | Chamie, 2008 <sup>16</sup>     | Northern California Veteran Affairs; USA, 1962-1971            | Cohort, incidence     | 2006 (NR)                        | 13144/363                        | Specific categories (see comments)                      | NR                         | 0.78 (0.72-0.85)                                                             | Age, race, agent Orange exposure, BMI, finasteride use, preoperative PSA level;<br>Smoking history was considered as a continuous variable as follows: 0, lifetime nonsmoker; 1, quit >14 years ago; 2, quit >7 years ago; 3, quit >4 years ago; 4, quit in the last year; and 5, current smoker |
| 8   | Li, 2011 <sup>74</sup>         | Ohsaki Cohort Study; Miyagi                                    | Cohort, incidence     | 2003                             | 22458/230                        | Never or former smoker                                  | 127                        | Referent                                                                     | None;<br>As the reference group included former smokers,                                                                                                                                                                                                                                         |

| No. | First author, publication year | Study name (or description); country, recruitment period | Study design, outcome | Last FU (FU <sup>a</sup> , yrs.) | Total no. men/cases <sup>b</sup> | Smoking category* | No. cases* | RR (95% CI)*                  | Variables the results were adjusted for; Other comments |
|-----|--------------------------------|----------------------------------------------------------|-----------------------|----------------------------------|----------------------------------|-------------------|------------|-------------------------------|---------------------------------------------------------|
|     |                                | Prefecture, Japan, 1995                                  |                       |                                  |                                  | Current           | 94         | 0.59 (0.45-0.77) <sup>d</sup> | this study was not included in our meta-analysis        |

Adj., adjusted; BMI, body mass index; BP, blood pressure; CCS, case-control study; DM, diabetes mellitus; FEV1, forced expiratory volume in one second; FU, follow-up; NR, not reported; NS, non-significant (95% CIs or p-values were not reported, but the authors reported that there was no significant association); pk-yr, pack-year; PSA, prostate-specific antigen; SES, socioeconomic status; yr, year  
\* Data on cigarette smoking. For qualitative measures of use, data on current cigarette smoking (at baseline) are shown in this table. When these data were not available, quantitative data on ever smoking (if available) are presented. Quantitative measures of former smoking are not shown.

<sup>a</sup> The mean or median of follow-up in years.

<sup>b</sup> The numbers in parentheses are the number of controls in nested case-control studies.

<sup>c</sup> Cumulative use during previous decade

<sup>d</sup> We calculated the risk estimates using frequency distributions only, comparing cases of prostate cancer (incident or death) with other participants. Evidently, time at risk was not considered in these calculations.

**Supplementary Table 2 – Association between cigarette smoking (current smokers at baseline) and prostate cancer incidence and mortality after various adjustments for potential confounding factors**

| Variables the results were adjusted for | No. of articles | RR (95% CI)      | $I^2$ statistics | $P$ for heterogeneity |
|-----------------------------------------|-----------------|------------------|------------------|-----------------------|
| <b>Mortality</b>                        |                 |                  |                  |                       |
| <i>Overall</i>                          |                 |                  |                  |                       |
| All articles                            | 19              | 1.24 (1.18-1.31) | 1                | 0.45                  |
| Age                                     | 16              | 1.26 (1.18-1.34) | 14               | 0.29                  |
| Age, race/ethnicity                     | 2               | 1.45 (1.17-1.80) | 46               | 0.17                  |
| Age, SES                                | 7               | 1.29 (1.18-1.40) | 8                | 0.36                  |
| Age, BMI                                | 8               | 1.32 (1.16-1.50) | 31               | 0.17                  |
| Age, diabetes                           | 6               | 1.30 (1.12-1.51) | 46               | 0.09                  |
| Age, family history <sup>a</sup>        | 3               | 1.40 (1.24-1.59) | 0                | 0.39                  |
| Age, SES, BMI <sup>b</sup>              | 4               | 1.29 (1.10-1.52) | 49               | 0.12                  |
| <i>1995 or earlier *</i>                |                 |                  |                  |                       |
| All articles                            | 10              | 1.24 (1.17-1.31) | 0                | 0.79                  |
| Age                                     | 8               | 1.24 (1.17-1.31) | 0                | 0.65                  |
| Age, SES                                | 3               | 1.31 (1.18-1.45) | 0                | 0.64                  |
| Age, BMI                                | 3               | 1.35 (1.17-1.55) | 0                | 0.86                  |
| <i>After 1995 *</i>                     |                 |                  |                  |                       |
| All articles                            | 8               | 1.24 (1.11-1.39) | 14               | 0.32                  |
| Age                                     | 7               | 1.24 (1.10-1.41) | 24               | 0.24                  |
| Age, SES                                | 4               | 1.27 (1.06-1.51) | 45               | 0.14                  |
| Age, BMI                                | 4               | 1.30 (1.07-1.58) | 49               | 0.12                  |
| <b>Incidence</b>                        |                 |                  |                  |                       |
| <i>Overall</i>                          |                 |                  |                  |                       |
| All articles                            | 33              | 0.90 (0.85-0.96) | 68               | <0.001                |
| Age                                     | 25              | 0.95 (0.89-1.01) | 59               | <0.001                |
| Age, race/ethnicity                     | 3               | 0.89 (0.77-1.04) | 32               | 0.23                  |
| Age, SES                                | 6               | 0.87 (0.82-0.93) | 26               | 0.24                  |
| Age, BMI                                | 7               | 0.89 (0.81-0.98) | 63               | 0.01                  |
| Age, diabetes                           | 5               | 0.89 (0.80-0.98) | 62               | 0.03                  |
| Age, family history <sup>a</sup>        | 2               | 0.91 (0.79-1.04) | 85               | 0.01                  |
| Age, SES, BMI <sup>b</sup>              | 3               | 0.84 (0.76-0.92) | 17               | 0.30                  |
| <i>1995 or earlier *</i>                |                 |                  |                  |                       |
| All articles                            | 15              | 1.06 (0.98-1.15) | 25               | 0.18                  |
| Age                                     | 13              | 1.06 (0.97-1.15) | 29               | 0.14                  |
| Age, SES                                | 1               | 1.20 (0.81-1.77) | –                | –                     |
| Age, BMI                                | 2               | 1.08 (0.88-1.33) | 0                | 0.55                  |
| <i>After 1995 *</i>                     |                 |                  |                  |                       |
| All articles                            | 18              | 0.84 (0.79-0.89) | 58               | 0.001                 |
| Age                                     | 12              | 0.89 (0.84-0.93) | 28               | 0.17                  |
| Age, SES                                | 5               | 0.86 (0.83-0.91) | 1                | 0.40                  |
| Age, BMI                                | 5               | 0.86 (0.78-0.95) | 66               | 0.02                  |

BMI, body mass index; CI, confidence interval; SES, socioeconomic status; RR, relative risk

<sup>a</sup> Family history of prostate cancer.

<sup>b</sup> These factors were selected because of relatively higher number of articles with results adjusted for them.

\* Last follow-up in 1995 or earlier versus after 1995. In the results for prostate cancer mortality, the last follow-up could not be abstracted from one of the articles,<sup>12</sup> in which the results were adjusted for age, diabetes, BMI, so the numbers of articles in the two time periods may not add up to the total number of articles. Only selected factors are shown, because the analysis stratified for other factors (race/ethnicity, diabetes, family history of prostate cancer, and combination of age, BMI, and SES) yielded only one or no articles for both mortality and incidence of prostate cancer.

**Supplementary Table 3 – Association between cigarette smoking (current smokers) at baseline and prostate cancer incidence and mortality by geographic area**

| Variables the results adjusted for  | No. of studies | RR (95% CI)      | I <sup>2</sup> statistics | P for heterogeneity |
|-------------------------------------|----------------|------------------|---------------------------|---------------------|
| <b>Mortality</b>                    |                |                  |                           |                     |
| <i>Overall</i>                      |                |                  |                           |                     |
| United States                       | 9              | 1.28 (1.18-1.40) | 27                        | 0.19                |
| Europe                              | 6              | 1.23 (1.10-1.38) | 0                         | 0.96                |
| Australia, New Zealand <sup>a</sup> | 1              | 1.67 (1.12-2.45) | –                         | –                   |
| Asia <sup>a</sup>                   | 4              | 1.10 (0.90-1.35) | 5                         | 0.37                |
| <i>1995 or earlier</i> *            |                |                  |                           |                     |
| United States                       | 6              | 1.24 (1.16-1.32) | 0                         | 0.46                |
| Europe                              | 3              | 1.26 (1.07-1.49) | 0                         | 0.79                |
| Australia, New Zealand              | 0              | –                | –                         | –                   |
| Asia                                | 1              | 1.10 (0.70-1.50) | –                         | –                   |
| <i>After 1995</i> *                 |                |                  |                           |                     |
| United States                       | 3              | 1.30 (1.01-1.68) | 59                        | 0.06                |
| Europe                              | 3              | 1.20 (1.03-1.41) | 0                         | 0.81                |
| Australia, New Zealand              | 0              | –                | –                         | –                   |
| Asia                                | 2              | 1.16 (0.92-1.48) | 0                         | 0.42                |
| <b>Incidence</b>                    |                |                  |                           |                     |
| <i>Overall</i>                      |                |                  |                           |                     |
| United States                       | 16             | 0.94 (0.86-1.03) | 66                        | <0.001              |
| Europe                              | 13             | 0.89 (0.81-0.99) | 74                        | <0.001              |
| Australia, New Zealand              | 1              | 0.73 (0.56-0.95) | –                         | –                   |
| Asia                                | 3              | 0.80 (0.71-0.90) | 0                         | 0.70                |
| <i>1995 or earlier</i> *            |                |                  |                           |                     |
| United States                       | 10             | 1.05 (0.95-1.16) | 15                        | 0.30                |
| Europe                              | 5              | 1.07 (0.92-1.23) | 40                        | 0.16                |
| Australia, New Zealand              | 0              | –                | –                         | –                   |
| Asia                                | 0              | –                | –                         | –                   |
| <i>After 1995</i> *                 |                |                  |                           |                     |
| United States                       | 6              | 0.85 (0.76-0.95) | 74                        | 0.002               |
| Europe                              | 8              | 0.84 (0.76-0.92) | 59                        | 0.02                |
| Australia, New Zealand              | 1              | 0.73 (0.56-0.94) | –                         | –                   |
| Asia                                | 3              | 0.80 (0.71-0.90) | 0                         | 0.70                |

<sup>a</sup> One of the studies<sup>12</sup> reported the results on smoking and prostate cancer mortality in both Australia/New Zealand and Asian regions. For this reason, this study has been counted twice here.

\* Last follow-up in 1995 or earlier versus after 1995. In the results for prostate cancer mortality, the last follow-up could not be abstracted from the above article, which reported on both Australia/New Zealand and Asian regions.<sup>12</sup>



**Supplementary Table 4 – Studies with indication of data collection on prostate cancer screening**

| First author, publication year  | Outcome                                                    | Categories                                                                                                                                                                 | No. cases*                                           | RR (95% CI)*                                                                                                                                        | Comment                                                                                                                                                                                                                                                                             |
|---------------------------------|------------------------------------------------------------|----------------------------------------------------------------------------------------------------------------------------------------------------------------------------|------------------------------------------------------|-----------------------------------------------------------------------------------------------------------------------------------------------------|-------------------------------------------------------------------------------------------------------------------------------------------------------------------------------------------------------------------------------------------------------------------------------------|
| Giovannucci, 1999 <sup>60</sup> | Mortality                                                  | 1986-1994 (total)<br>Metastatic<br>Fatal<br>1988-1994 (negative DRE in 1988)<br>Metastatic<br>Fatal                                                                        | 152<br>103<br>57<br>37                               | Increment of 15 pack-years of cigarettes smoked in the prior decade<br>1.55 (1.04-2.33)<br>1.77 (1.11-4.07)<br>2.05 (1.12-3.75)<br>2.40 (1.17-4.91) | The method of diagnosis of cancer was not reported in this study, but the association between smoking and prostate cancer mortality was slightly stronger in those who had a normal DRE early in the study, suggesting that prostate cancer might progress more rapidly in smokers. |
| Hultdin, 2005 <sup>69</sup>     | Incidence                                                  | –                                                                                                                                                                          | –                                                    | –                                                                                                                                                   | PSA was done, but results were not reported by smoking status. Cause of workup leading to prostate cancer diagnosis was routine health checkup (12%), local symptoms (55%), other causes (13%), or not registered/missing (20%).                                                    |
| Giovannucci, 2007 <sup>71</sup> | Incidence, mortality                                       | –                                                                                                                                                                          | –                                                    | –                                                                                                                                                   | PSA testing in the prior 2 years was asked biennially from 1994 to 2000. PSA screening intensity was very high in the study population and relatively equal across categories of smoking: 75% for never smokers and 70% for current smokers.                                        |
| Gonzalez, 2007 <sup>11</sup>    | Incidence                                                  | –                                                                                                                                                                          | –                                                    | –                                                                                                                                                   | PSA was done, but results were not reported by smoking status. In 83% prostate cancer cases and 72% non-cases PSA test had been done within the two years prior to baseline.                                                                                                        |
| Watters, 2009 <sup>18</sup>     | Incidence<br><br><br><br><br><br><br><br><br><br>Mortality | PSA screened<br>Never<br>Current<br>No PSA test<br>Never<br>Current<br>Missing PSA test information<br>Never<br>Current<br>PSA screened<br>Never<br>Current<br>No PSA test | 2684<br>554<br>492<br>213<br>2336<br>697<br>36<br>15 | Referent<br>0.95 (0.86-1.04)<br>Referent<br>0.92 (0.86-1.04)<br>Referent<br>0.76 (0.70-0.83)<br>Referent<br>1.64 (0.95-2.83)                        | Current smokers were less likely to have been screened with PSA (57%) and/or DRE (72%) during the past 3 years than former and never smokers (PSA 73% and DRE 85% in both).                                                                                                         |

| First author, publication year | Outcome   | Categories                                                                                                                                                                                                             | No. cases*                                          | RR (95% CI)*                                                                                                                                     | Comment                                                                                                                                                                                                                                                                                                                                  |
|--------------------------------|-----------|------------------------------------------------------------------------------------------------------------------------------------------------------------------------------------------------------------------------|-----------------------------------------------------|--------------------------------------------------------------------------------------------------------------------------------------------------|------------------------------------------------------------------------------------------------------------------------------------------------------------------------------------------------------------------------------------------------------------------------------------------------------------------------------------------|
|                                |           | Never<br>Current<br>Missing PSA test information                                                                                                                                                                       | 15<br>18                                            | Referent<br>2.30 (1.18-4.48)                                                                                                                     |                                                                                                                                                                                                                                                                                                                                          |
|                                |           | Never<br>Current                                                                                                                                                                                                       | 54<br>31                                            | Referent<br>1.49 (0.97-2.30)                                                                                                                     |                                                                                                                                                                                                                                                                                                                                          |
| Grundmark, 2011 <sup>20</sup>  | Incidence | –                                                                                                                                                                                                                      | –                                                   | –                                                                                                                                                | Very few prostate cancer cases (<2%) were diagnosed using PSA screening.                                                                                                                                                                                                                                                                 |
| Koutros, 2013 <sup>28</sup>    | Incidence | –                                                                                                                                                                                                                      | –                                                   | –                                                                                                                                                | Men were randomized to either the control or screening arm of the trial. To the screening arm, a PSA test and digital rectal exam at baseline and annually thereafter for 3 years, followed by 2 years of screening with PSA alone was offered. However, PSA results were not reported by smoking status.                                |
| Sawada, 2013 <sup>32</sup>     | Incidence | All cases<br>Never smokers<br>0-20 pack-years<br>20-40 pack-years<br>≥40 pack-years<br>Cases detected by subjective symptoms (not screening)<br>Never smokers<br>0-20 pack-years<br>20-40 pack-years<br>≥40 pack-years | 257<br>53<br>194<br>133<br><br>59<br>13<br>46<br>43 | Referent<br>0.67 (0.49-0.91)<br>0.84 (0.70-1.02)<br>0.80 (0.65-1.00)<br><br>Referent<br>0.82 (0.44-1.54)<br>0.95 (0.64-1.43)<br>1.12 (0.74-1.69) | Smoking had a significant inverse association with prostate cancer incidence in those who were diagnosed with prostate cancer using screening, but not in those who were diagnosed by subjective symptoms.<br>39% of prostate cancers detected by PSA screening and 45% of cancers detected by subjective symptoms were current smokers. |

DRE, digital rectal examination; PSA, prostate-specific antigen

Note: Here, only studies with any indication of collection of data on prostate cancer screening are presented. Some studies provided prevalence of screening in the countries where the studies were conducted or used a cutoff year as a surrogate for screening status. These studies were not included here as they did not provide information about actual screening prevalence in the study population (either population or opportunistic screening).

**Supplementary Fig. 1 – Funnel plot for publication bias for the studies reporting on current smoking at baseline and mortality from prostate cancer**

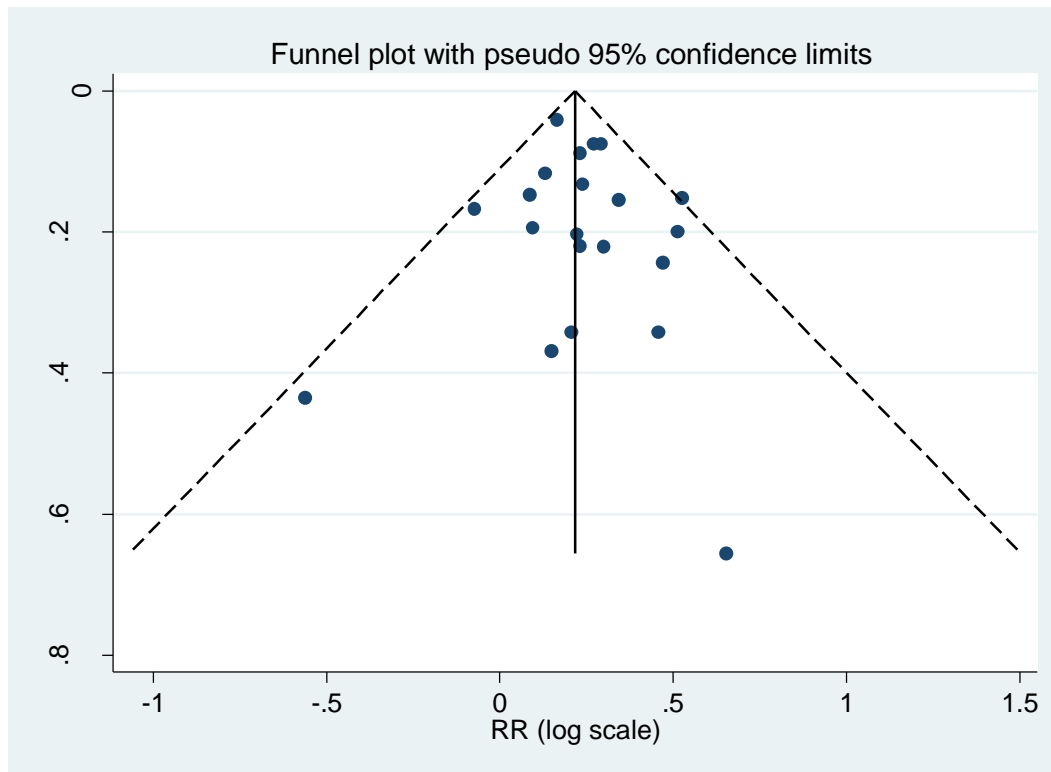

RR, relative risk.

Twenty one dots from 19 studies (two studies had two subgroups each).

The p-value for publication bias was 0.83 and 0.48 using the Begg and Mazumdar and the Egger's methods, respectively.

**Supplementary Fig. 2 – Association between previous tobacco smoking (former smokers) and prostate cancer mortality**

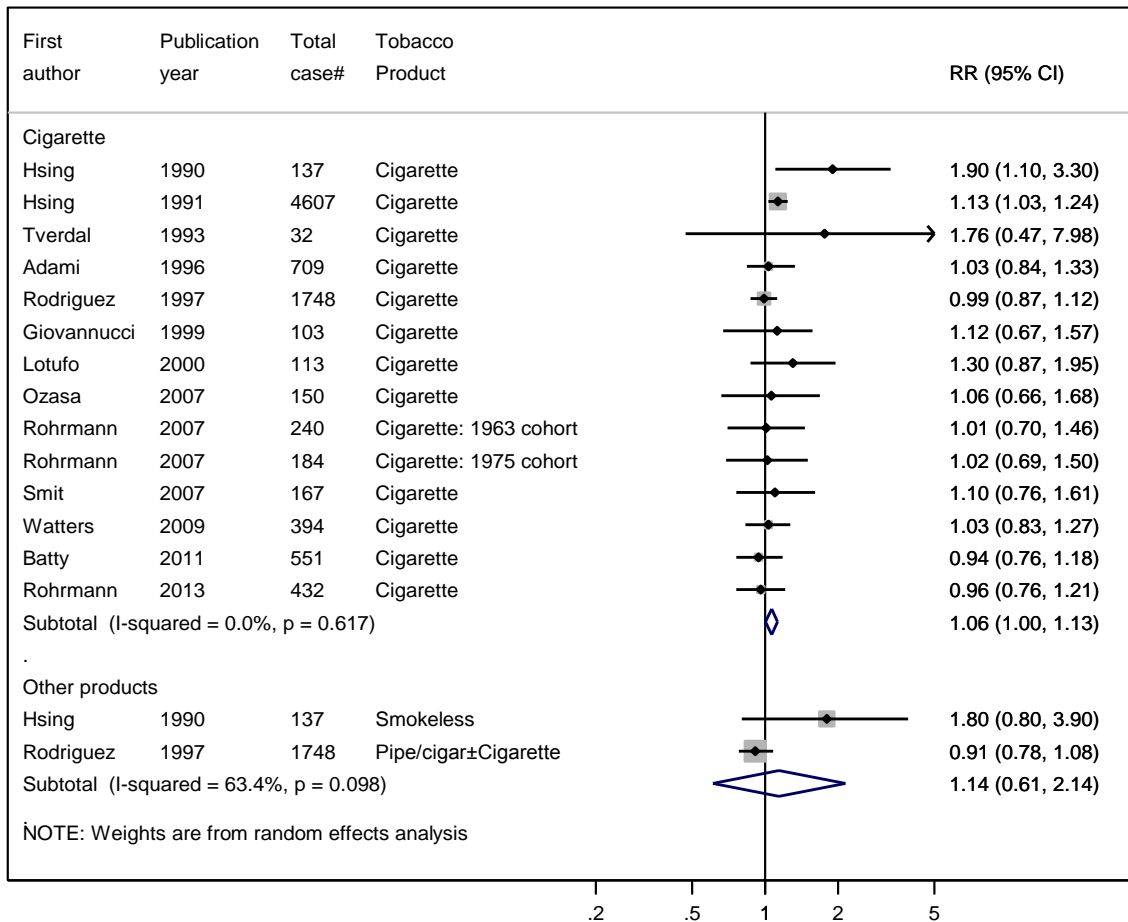

**Supplementary Fig. 3 – Association between ever tobacco smoking and prostate cancer mortality**

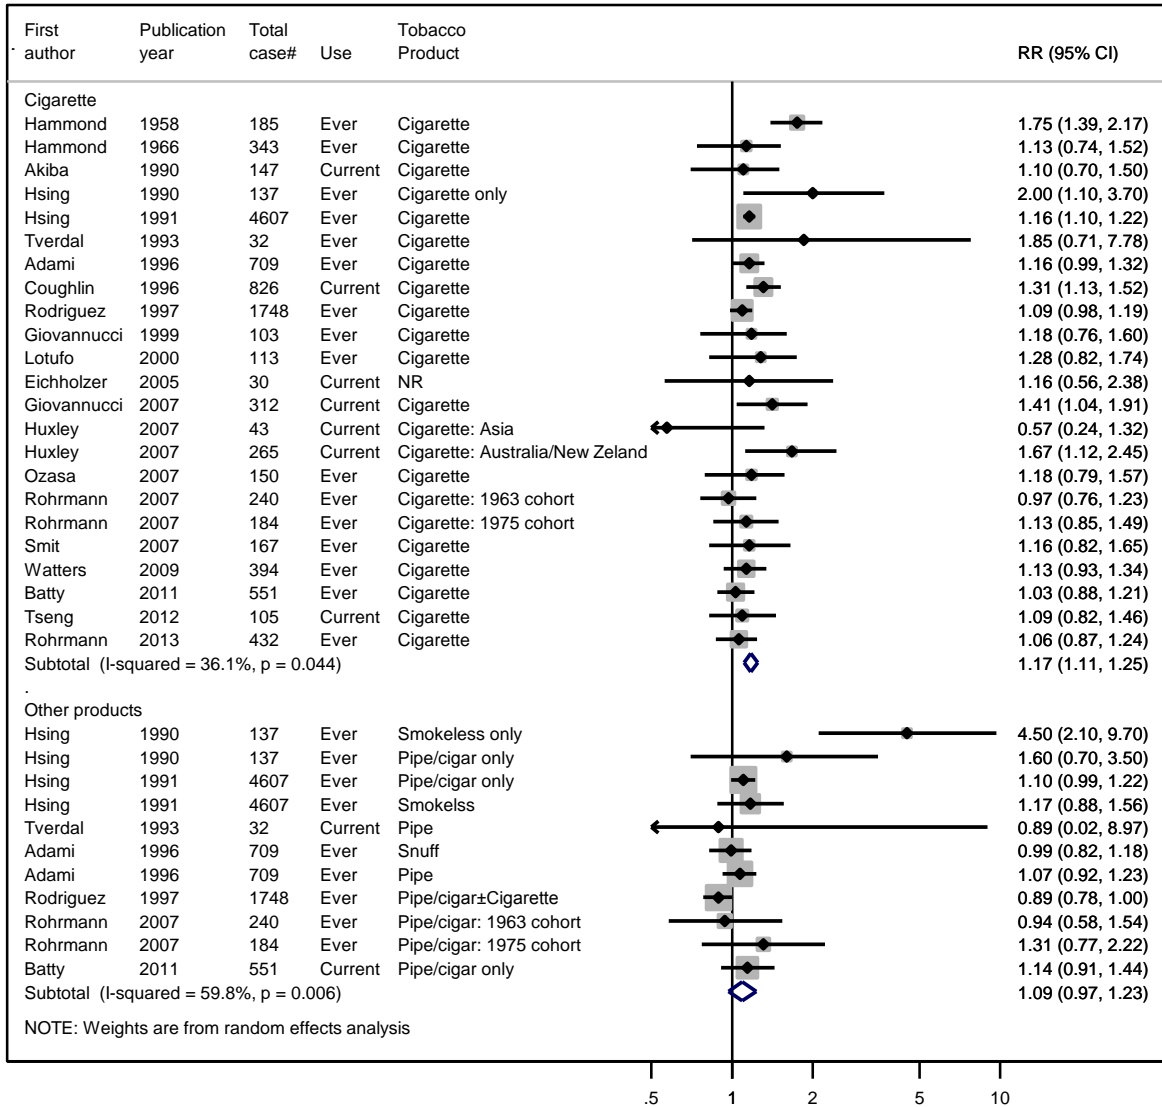

**Supplementary Fig. 4 – Association between current cigarette smoking at baseline and risk of prostate cancer death by the year of last follow-up (1995 or earlier and after 1995)**

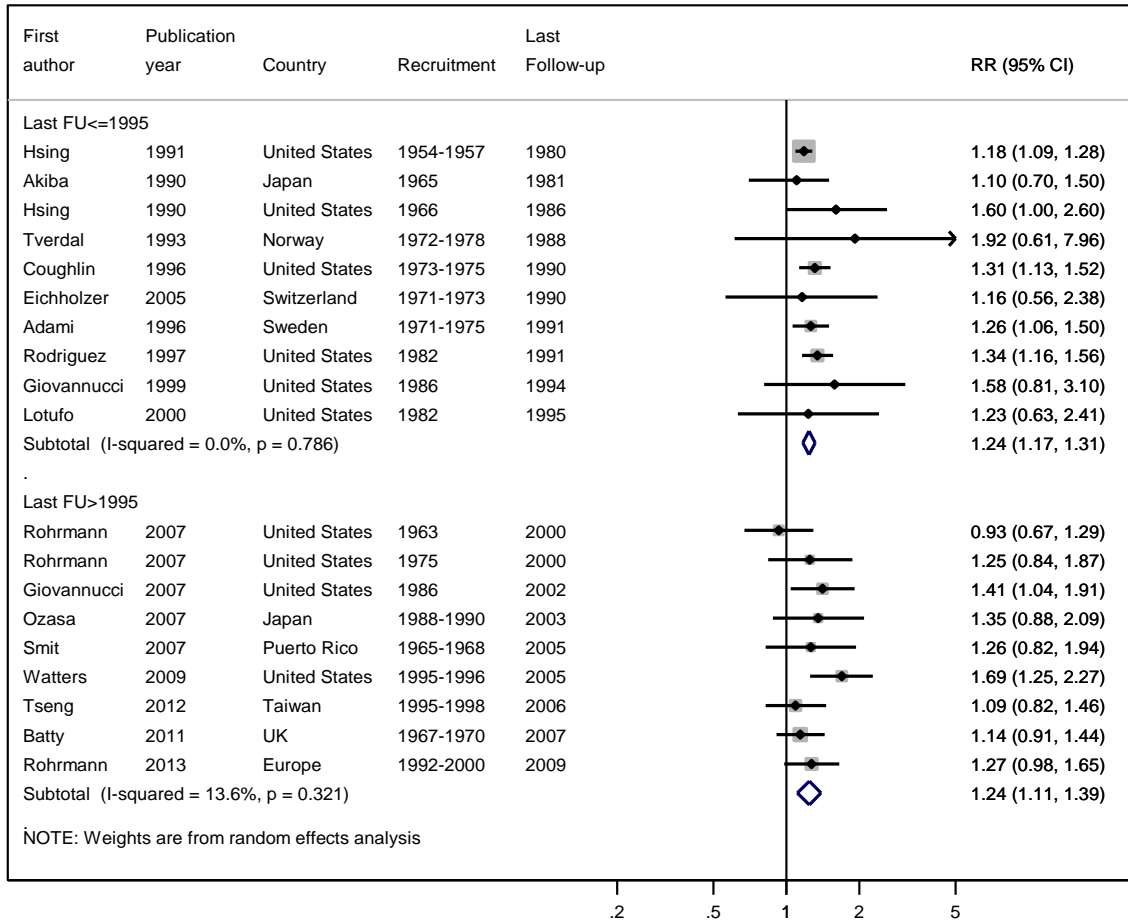

Rohrman et al (2007)<sup>72</sup> had two sub-populations.

**Supplementary Fig. 5 – Association between current tobacco smoking and risk of incident prostate cancer**

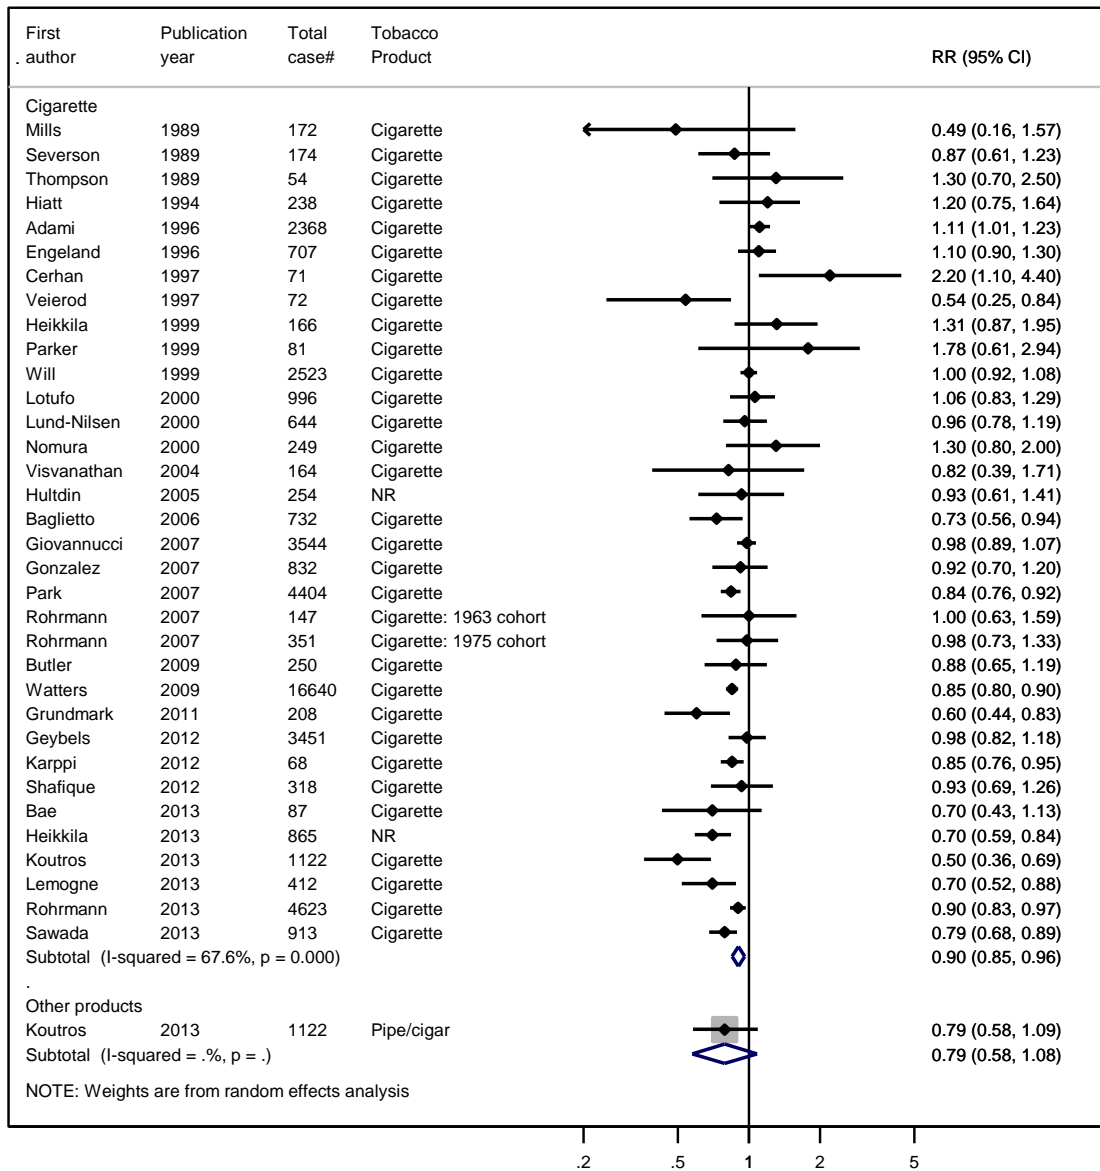

**Supplementary Fig. 6 – Association between amount of cigarette smoking at baseline and prostate cancer incidence using meta-regression method**

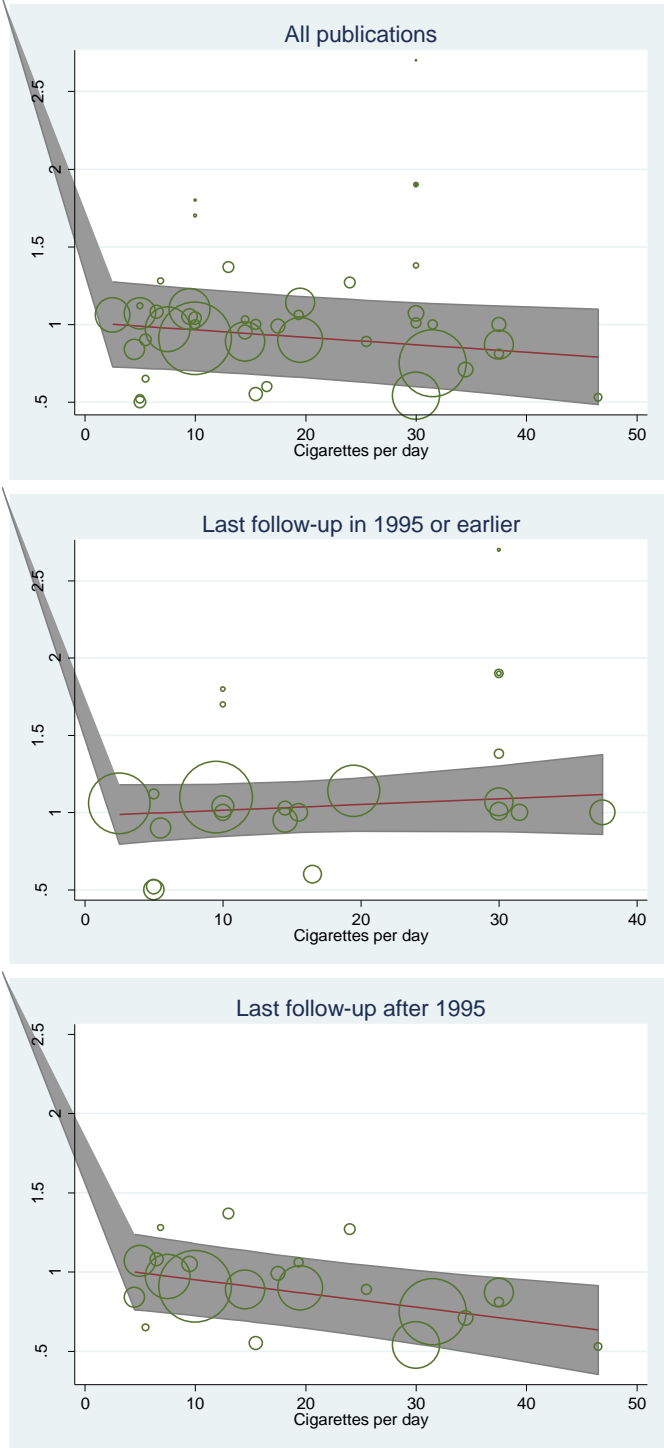



**Supplementary Fig. 7 – Association between cumulative cigarette smoking and prostate cancer incidence using meta-regression method**

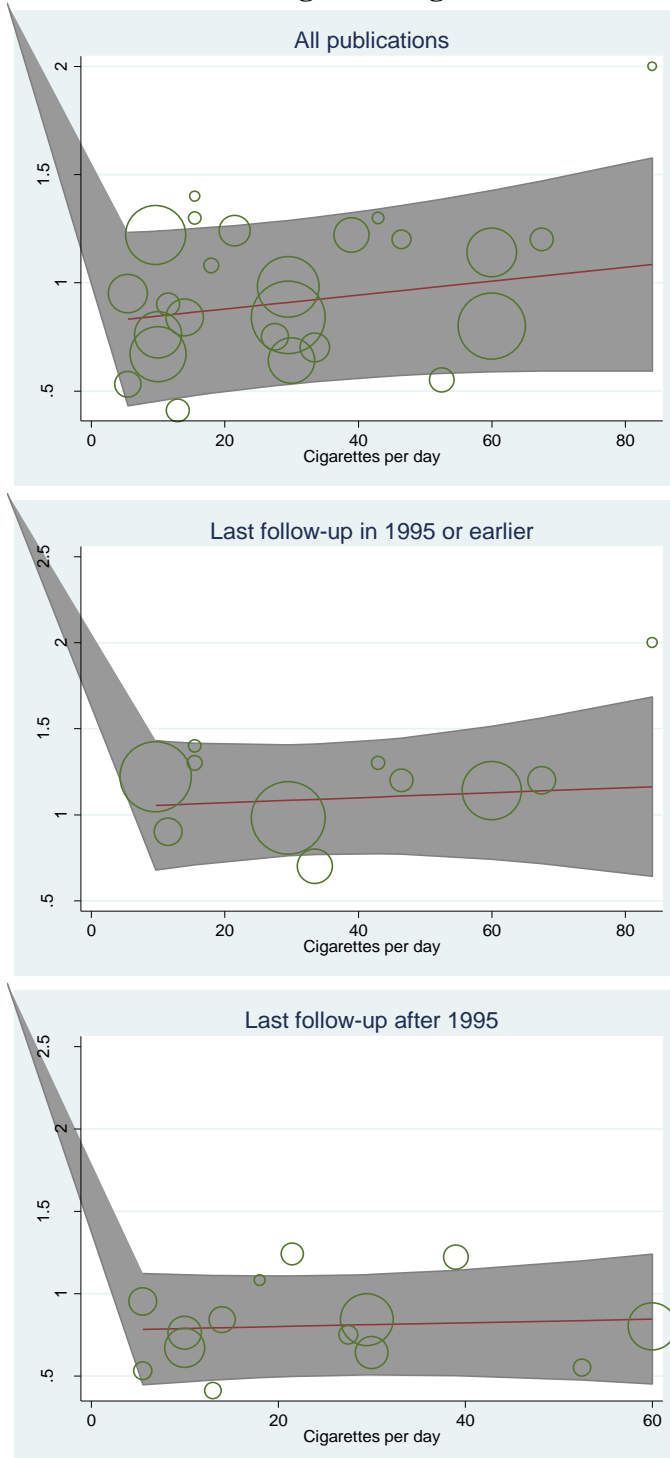

**Supplementary Fig. 8 – Association between previous tobacco smoking (former smokers) and risk of incident prostate cancer**

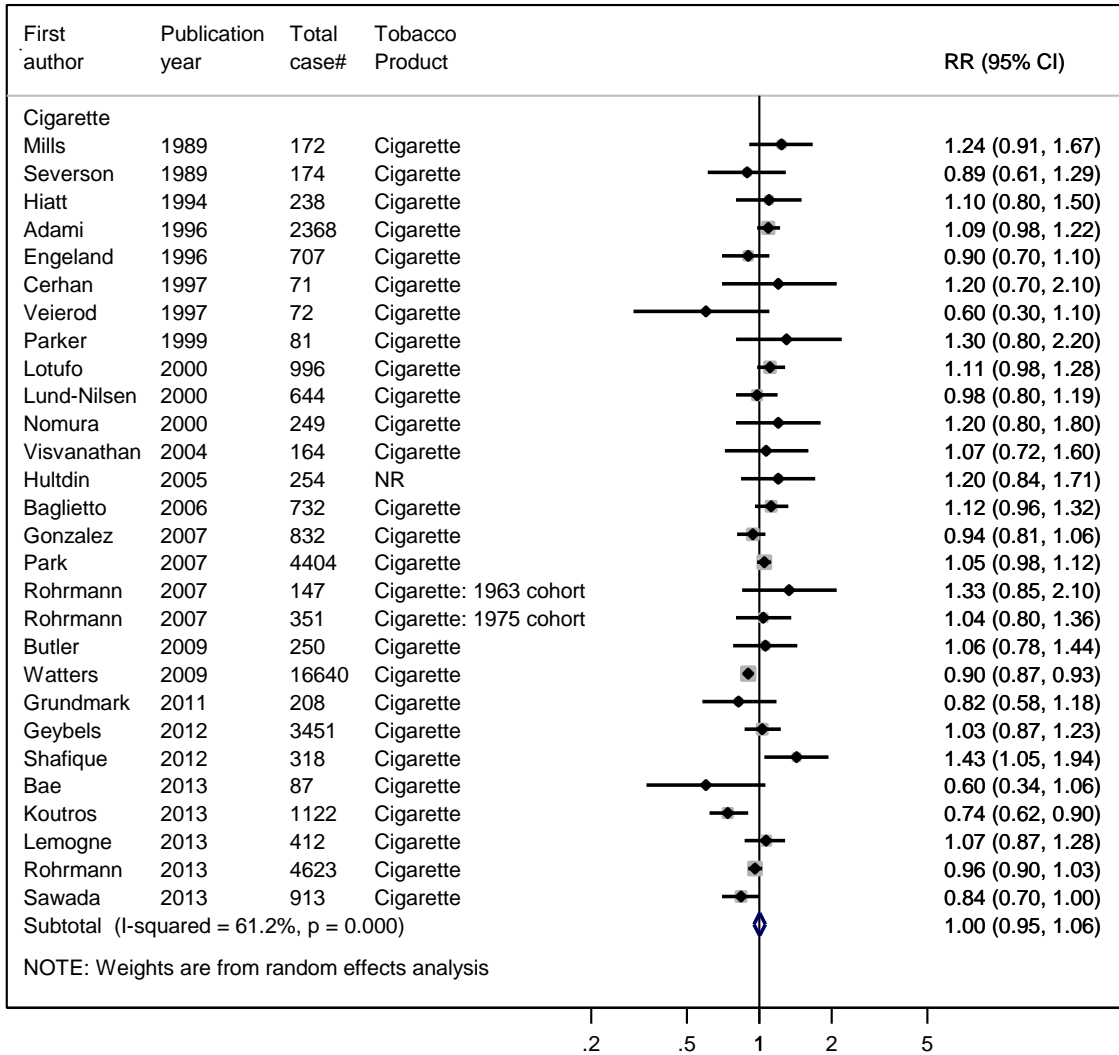

**Supplementary Fig. 9 – Association between ever tobacco use and risk of incident prostate cancer**

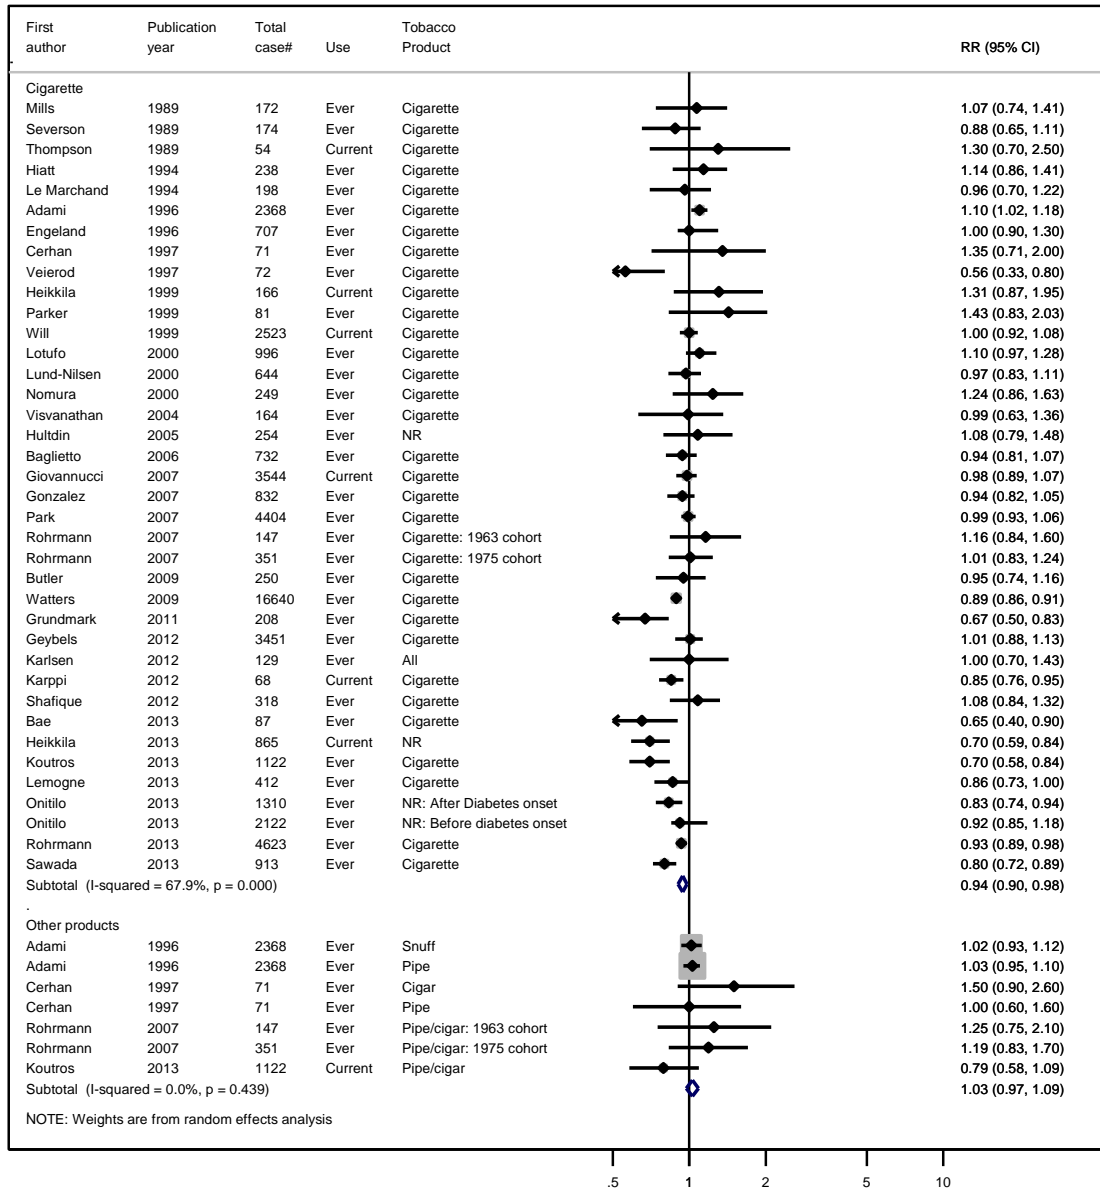

**Supplementary Fig. 10 – Association between current cigarette smoking at baseline and risk of incident prostate cancer by the year of last follow-up (1995 or earlier and after 1995)**

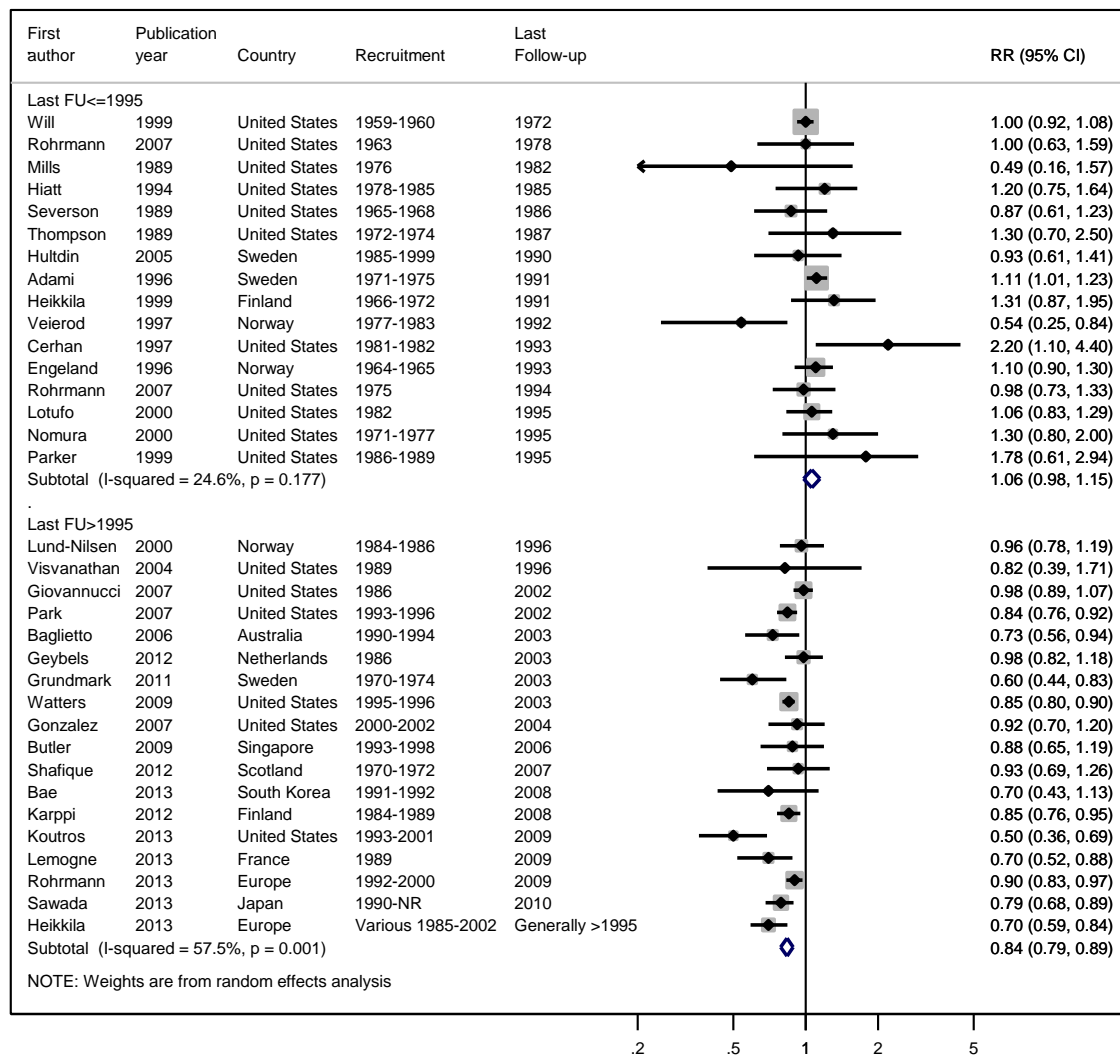

Rohrmann et al (2007)<sup>72</sup> had two sub-populations.
